# Supplementary material
Source: PubMed Central journal article supplement (PMC3987918)
Supplement: NIHMS565644-supplement-Supplementary_Information.pdf [file NIHMS565644-supplement-Supplementary_Information.pdf]

Supplementary Figure:

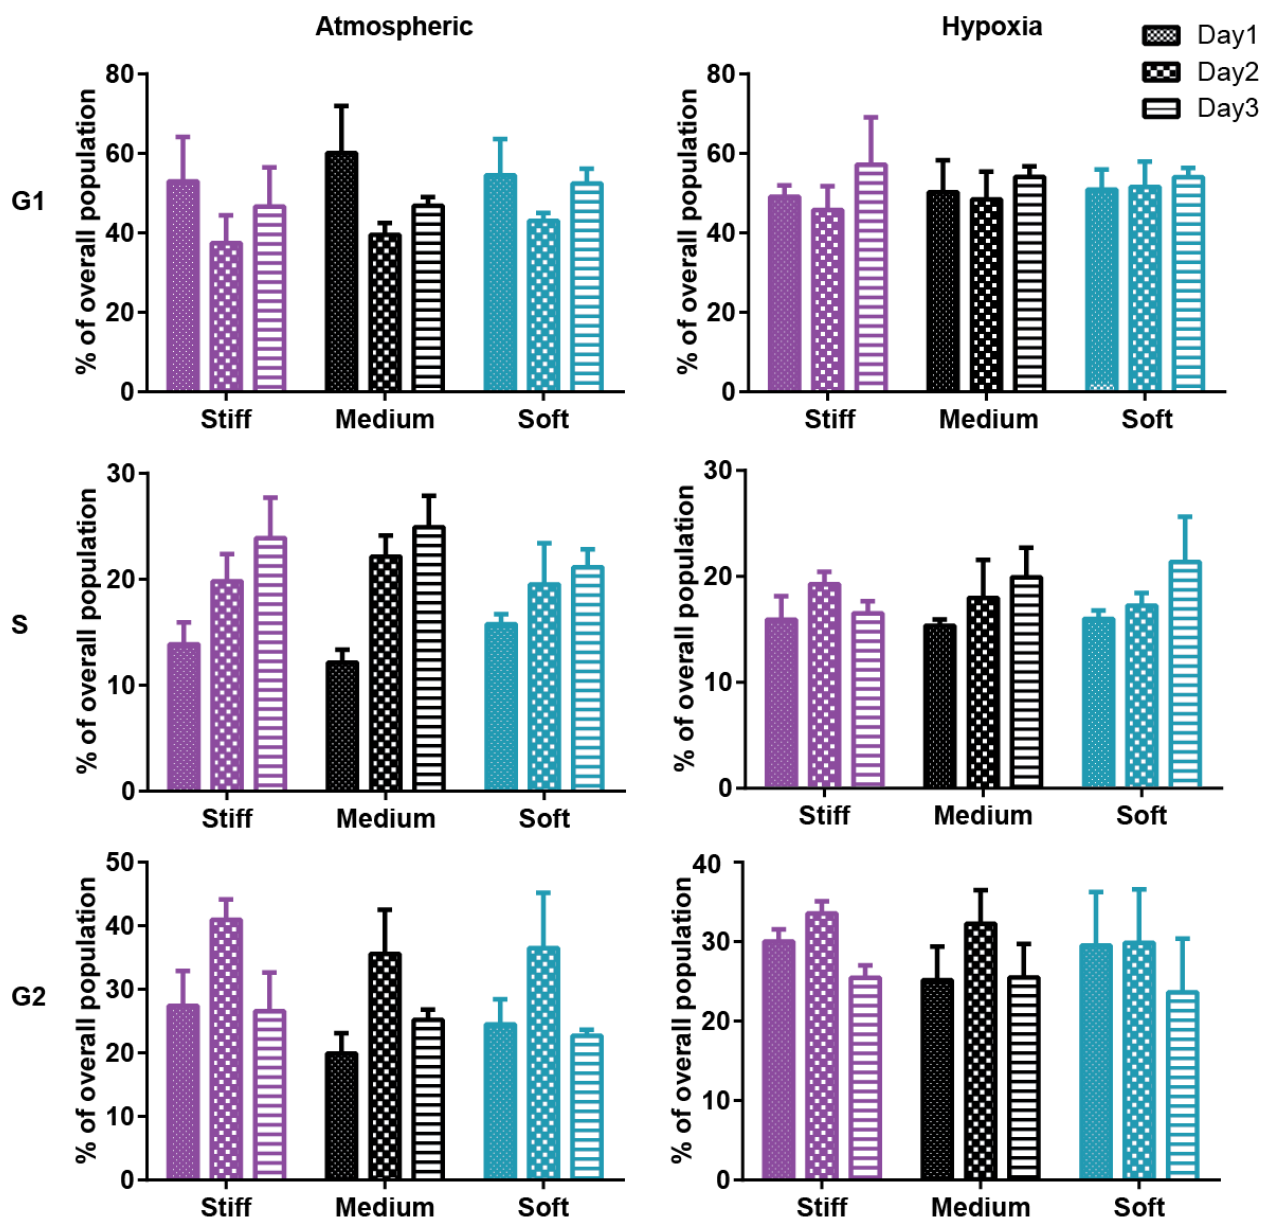

**Supplementary Figure 1: Cell cycle.** Flow analysis of cell cycle phases (G1,S,G2) in HT1080 cells encapsulated in all hydrogels types over the three-day experiment in atmospheric and hypoxic conditions.
